# Supplementary material for: Efficient Exact Maximum a Posteriori Computation for Bayesian SNP Genotyping in Polyploids
Source: PubMed Central journal article supplement (PMC3281906; doi:10.1371/journal.pone.0030906), 2012-02-17
Supplement: pone.0030906.s001.pdf [file pone.0030906.s001.pdf]

# Efficient Exact Maximum a Posteriori Computation for Bayesian SNP Genotyping in Polyploids

Oliver Serang<sup>1,2,\*</sup>, Marcelo Mollinari<sup>3</sup>, Antonio Augusto Franco Garcia<sup>3</sup>

**1** Department of Neurobiology, Harvard Medical School, Boston, MA United States

**2** Department of Pathology, Children's Hospital Boston, Boston, MA, United States

**3** Department of Genetics, University of São Paulo/ESALQ, Piracicaba, São Paulo, Brazil

\* E-mail: Oliver.Serang@Childrens.Harvard.edu

## 1 Proof of Maximum a Posteriori Genotypes by Searching the Distribution $C$

**Lemma 1** Given  $\sigma > 0$ ,  $\Pr(D|G)$  decreases monotonically with  $\|D - G\|_2^2$ .

**Proof**

$$\begin{aligned}
 \log(\Pr(D|G)) &= \sum_i \log(\Pr(D_i|G_i)) \\
 &= -\sum_i \frac{(D_i - G_i)^2}{2\sigma^2} - \sqrt{2\pi}\sigma \\
 &= c_\sigma^{(1)} - c_\sigma^{(2)} \sum_i (D_i - G_i)^2 \\
 &= c_\sigma^{(1)} - c_\sigma^{(2)} \|D - G\|_2^2
 \end{aligned}$$

where  $c_\sigma^{(1)}$  and  $c_\sigma^{(2)}$  depend only on  $\sigma$  and  $c_\sigma^{(2)} > 0$ . ■

**Lemma 2** Given  $\sigma > 0$  and  $D_1 < D_2$ , the genotype assignment  $G = g = (g_1, g_2, g_3, g_4, \dots, g_n)$  where  $g_1 = \mu_1, g_2 = \mu_0$  s.t.  $\mu_1 > \mu_0$  is less likely than genotype assignment  $G = g' = (g'_1, g'_2, g_3, g_4, \dots, g_n)$  where  $g'_1 = \mu_0, g'_2 = \mu_1$ .

**Proof**

$$\begin{aligned}
 \Pr(D|G) &= \prod_i \Pr(D_i|G_i) \\
 &= \Pr(D_1|G_1) \Pr(D_2|G_2) \prod_{i:i>2} \Pr(D_i|G_i)
 \end{aligned}$$

$$\begin{aligned}
 &\underset{(G_1, G_2) \in \{(g_1, g_2), (g'_1, g'_2)\}}{\operatorname{argmax}} \Pr(D_1|G_1) \Pr(D_2|G_2) \prod_{i:i>2} \Pr(D_i|G_i) \\
 &= \underset{(G_1, G_2) \in \{(g_1, g_2), (g'_1, g'_2)\}}{\operatorname{argmax}} \Pr(D_1|G_1) \Pr(D_2|G_2)
 \end{aligned}$$

because  $\prod_{i:i>2} \Pr(D_i|G_i) > 0$ .

By Lemma 1,  $\Pr(D_1|G_1) \Pr(D_2|G_2)$  decreases monotonically with  $\|(D_1, D_2) - (G_1, G_2)\|_2^2$ .

$$\begin{aligned}
\left\| \begin{bmatrix} D_1 \\ D_2 \end{bmatrix} - \begin{bmatrix} \mu_0 \\ \mu_1 \end{bmatrix} \right\|_2^2 &= \left\| \begin{bmatrix} D_1 \\ D_2 \end{bmatrix} - \begin{bmatrix} \mu_1 \\ \mu_0 \end{bmatrix} \right\|_2^2 \\
&= -2[D_1, D_2] \begin{bmatrix} \mu_0 \\ \mu_1 \end{bmatrix} + 2[D_1, D_2] \begin{bmatrix} \mu_1 \\ \mu_0 \end{bmatrix} \\
&= 2[D_1, D_2] \left( \begin{bmatrix} \mu_1 \\ \mu_0 \end{bmatrix} - \begin{bmatrix} \mu_0 \\ \mu_1 \end{bmatrix} \right) \\
&= 2(D_1(\mu_1 - \mu_0) - D_2(\mu_1 - \mu_0)) \\
&= 2(\mu_1 - \mu_0)(D_1 - D_2) < 0
\end{aligned}$$

Therefore,  $\Pr(D_1|G_1 = \mu_1)\Pr(D_2|G_2 = \mu_0) < \Pr(D_1|G_1 = \mu_0)\Pr(D_2|G_2 = \mu_1)$  and  $\Pr(D|G = g) < \Pr(D|G = g')$  ■

**Lemma 3** Given the number of individuals with each genotype  $C_j = |\{i : g_i = \mu_j\}|$ , the search space of consistent genotype configurations is  $\{g : C\} = \{g \in \{\mu'_0, \mu'_1, \dots, \mu'_{k'}\}^n : C\}$  where  $\{\mu'_0, \mu'_1, \dots, \mu'_{k'}\} = \{\mu_j : j \in \{1, \dots, k\}, C_j > 0\}$ .

**Proof**

$$C_j = 0 \leftrightarrow \forall i g_i \neq \mu_j$$

Therefore,  $\{g : C\} = \{\mu_j : j \in \{1, \dots, k\}, C_j > 0 : C\}^n$ . ■

**Lemma 4** Given ploidy  $P = p$ ,  $\sigma > 0$ , data and labels ordered so that  $D_1 < D_2 < \dots < D_n$  and  $\mu'_0 < \mu'_1 < \dots < \mu'_{k'}$ , and genotype counts  $C$  (where  $\mu'_i$  and  $C$  are defined in Lemma 3), then in the most likely genotype configuration  $g^* = (g_1^*, g_2^*, \dots, g_n^*) = \operatorname{argmax}_g \Pr(D|G = g)$ ,  $g_1^* = \mu'_0$

**Proof** By Lemma 3,

$$\begin{aligned}
&\operatorname{argmax}_{g \in \{\mu_0, \mu_0, \dots, \mu_P\}^n : C} \Pr(D|G = g) \\
&= \operatorname{argmax}_{g \in \{\mu'_0, \mu'_1, \dots, \mu'_{k'}\}^n : C} \Pr(D|G = g)
\end{aligned}$$

$\forall g : g_1 = \mu'_j \neq \mu'_0$ , there must be some  $i' > 1$  for which  $g_{i'} = \mu'_0$  (because  $C_0 > 0$  and the  $\mu_j$  are unique for a given ploidy). Given that the  $D_i$  are sorted in ascending order, then  $D_{i'} > D_1$  and  $\mu'_0 < \mu'_j$ . By Lemma 2, choosing  $g'$  such that  $g'_1 = \mu_0$  and  $g'_{i'} = \mu'_j$  does not change the genotype counts, but increases the probability. Therefore, any configuration with  $g_1 \neq \mu'_0$  is suboptimal. Hence by contradiction, in any optimal configuration  $g^*$ ,  $g_1^* = \mu'_0$ . ■

**Theorem 5** Given ploidy  $P = p$ ,  $\sigma > 0$ , data and labels ordered so that  $D_1 < D_2 < \dots < D_n$  and  $\mu'_0 < \mu'_1 < \dots < \mu'_{k'}$ , and genotype counts  $C$  (where  $\mu'_i$  and  $C$  are defined in Lemma 3), then the unique

most likely genotype configuration is given by

$$\begin{aligned}
g_1^* &= \mu'_0 \\
g_2^* &= \mu'_0 \\
&\vdots \\
g_{C_0}^* &= \mu'_0 \\
g_{C_0+1}^* &= \mu'_1 \\
&\vdots \\
g_{C_0+C_1}^* &= \mu'_1 \\
g_{C_0+C_1+1}^* &= \mu'_3 \\
&\vdots \\
g_{C_0+C_1+C_2}^* &= \mu'_3 \\
&\vdots \\
g_{C_0+C_1+C_2+\dots+C_{k'-1}}^* &= \mu'_{k'-1} \\
&\vdots \\
g_{C_0+C_1+C_2+\dots+C_{k'}}^* &= \mu'_{k'}
\end{aligned}$$

**Proof** By Lemma 4 if  $g^* = \operatorname{argmax}_{g:C} \Pr(D|G = g)$ , then  $g_1^* = \mu'_0$ . Then  $g^* = (g_1^*, g^{(2)*})$  and  $g^* = \operatorname{argmax}_{g:C, g_1^* = \mu'_0} \Pr(D|G = g) = \operatorname{argmax}_{g^{(2)}:C^{(2)}} \Pr(D|G = g^{(2)})$  where  $C^{(2)} = (C_0 - 1, C_1, \dots, C_{k'})$ . Inductively, this creates a series of maximization problem of the same form. For maximization problem  $i$  in this series, the smallest remaining  $\mu'_j$  for which  $C_j^{(i)} > 0$  is assigned to  $g_i^*$ . For this reason,  $\mu'_0$  is assigned to  $g_1^*, \dots, g_{C_0}^*$  because they correspond to the smallest  $D_1, \dots, D_{C_0}$ . After  $g_1^*, \dots, g_{C_0}^*$  are assigned, then the new smallest value of  $\mu'_j$  s.t.  $C_j^{(C_0)} > 0$  will be  $\mu'_1$ ; therefore,  $\mu'_1$  will be assigned to the next  $C_1$  genotypes  $g_{C_0+1}^*, \dots, g_{C_0+C_1}^*$ ,  $\mu'_3$  will be assigned to the next  $C_2$  genotypes,  $g_{C_0+C_1+1}^*, \dots, g_{C_0+C_1+C_2}^*$ , etc. until all genotypes have been filled.

**Corollary 6** Given a distribution prefix  $C^{pref} = (C_0, C_1, \dots, C_j)$  with total sum  $n^{pref}$ , for all suffixes  $C^{suf}$ , the optimal genotype configuration must include the optimal genotype configuration must include the genotype assignments resulting from the subproblem on  $C^{pref}, g^{pref}, n^{pref}$  where  $g^{pref} = (g_1, g_2, \dots, g_{n^{pref}})$  are in sorted order. Call this prefix configuration  $g_{C^{pref}}^{pref}$ .

**Proof** For any distribution configuration  $C = (C^{pref}, C^{suf})$ , Theorem 5 defines the optimal genotype configuration by sorting the unassigned individuals after the smallest  $C_0, C_1, \dots$  are assigned. Any genotype configuration that violates this ordering for a smaller problem will necessarily violate for any suffix  $C^{suf}$ ; therefore, in the optimal configuration, the order must be applied in  $C^{pref}$  to achieve optimality.

**Theorem 7** Let the prior on  $G$  be uniform (not all configurations will be weighted equally because configurations yielding a more probable distribution  $C$  will be weighted more). Given ploidy  $P = p$ , sigma  $> 0$ , and the theoretical distribution  $T$ , the genotype configuration that maximizes the posterior is given by  $g^* = \{g_C^* : \forall C \Pr(D|G = g_C^*) \Pr(C|T) = f^*\}$ , where  $f^*$  denotes the maximum value of  $\Pr(D|G = g) \Pr(C|T)$  and  $g_C^*$  is defined by Theorem 5 for the given genotype counts  $C$ .

**Proof** Denote the genotype counts for a given configuration as  $c(g)$ . Let  $f(g, c(g)) = \Pr(D|G =$

$g) \Pr(C = c(g)|T)$ .

$$\begin{aligned}
f^* &= \max_g f(g, c(g)) \\
&= \max_{g, c': c'=c(g)} f(g, c') \\
&= \max_{c': \exists g, c'=c(g)} \max_{g: c'=c(g)} f(g, c') \\
&= \max_{c'} \max_{g: c'=c(g)} f(g, c')
\end{aligned}$$

because every considered genotype count is attainable from some genotype configuration.

Theorem 5 states that for a given  $c'$ ,  $g_{c'}^*$  attains the unique maximum  $\max_{g: c'=c(g)} \Pr(D|G = g)$ . For any fixed  $c'$ ,  $\Pr(C = c'|T)$  is a positive constant, and so  $g_{c'}^*$  also maximizes  $f(g, c')$ .

Therefore,

$$f^* = \max_{c'} \max_{g: c'=c(g)} f(g, c') = \max_{c'} f(g_{c'}^*, c')$$

If  $f(g, c(g)) = f^*$ , then  $g$  must attain the maximum for that  $c(g)$ ,  $\max_{g: c'=c(g)} f(g, c')$ . Because  $\max_{g: c'=c(g)} f(g, c')$  has a unique optimum  $g_{c'}^*$  for any  $c'$ , then any optimal  $g^*$  must be in the set  $\{g_{c'}^* : \forall c'\}$  and must attain the maximum  $f^*$ . ■

By Theorem 7, the optimal genotype configuration can be found by searching all  $C$  and choosing the  $g_C^*$  that maximizes  $\Pr(D|G = g_C^*)$ . Given that genotype configurations have uniform prior (before being weighted by the distribution  $C = c(g)$  that each produces), then the configuration that maximizes  $\Pr(D|G = g)$  will maximize  $\Pr(G = g|D)$ .

## 2 Branch and Bound

**Lemma 8** *The multinomial probability*

$$\binom{n}{C_0} \binom{n-C_0}{C_1} \binom{n-C_0}{C_1} \dots \binom{n-C_0-C_1-\dots-C_{k-1}}{C_k} p_1^{C_0} p_2^{C_1} \dots p_k^{C_k}$$

is bounded above by

$$\binom{n}{C_0} \binom{n-C_0}{C_1} \binom{n-C_0}{C_1} \dots \binom{n-C_0-C_1-\dots-C_{i-1}}{C_i} \times p_1^{C_0} p_2^{C_1} \dots p_i^{C_i} (1-p_1-p_2-\dots-p_i)^{n-C_0-C_1-\dots-C_i}$$

for any  $i < k$ .

**Proof**  $\binom{n}{n'} p^{n'} (1-p)^{n-n'} \leq 1$  because it defines a single term in the binomial expansion series  $(p+1-p)^n$  and each term in the series is nonnegative. The value

$$\binom{n}{C_0} \binom{n-C_0}{C_1} p_1^{C_0} p_2^{C_1} (1-p_2)^{n-C_0-C_1} \leq \binom{n}{C_0} p_1^{C_0} (1-p_1)^{n-C_0}$$

because a positive constant  $\binom{n}{C_0} p_1^{C_0}$  can be divided out. By induction, extending the series from  $i$  to  $i+1$  must decrease it; therefore, since  $k > i$ , the series value must be smaller than the series value for  $i$ . ■

**Theorem 9** Given  $T_\theta = (p_0, p_1, \dots, p_P)$  and  $C^{pref} = (C_0, C_1, \dots, C_j)$  with  $C_0 + C_1 + \dots + C_j = n^{pref}$ , the joint probability of the best genotype configuration compatible with that distribution is bounded by:

$$\begin{aligned} & \operatorname{argmax}_g \max_{C^{suf}} \Pr(D, G = g, (C^{pref}, C^{suf}) = c(g)) \leq \\ & \frac{n!}{C_0! C_1! \dots C_j!} \left[ \prod_{j' \leq j} p_{j'}^{C_{j'}} \right] (1 - p_0 - p_1 - \dots - p_j)^{n - n^{pref}} \times \\ & \Pr(D^{pref} | G^{pref} = g_{C^{pref}}^{pref}) \prod_{i > n^{pref}} \max_{g_i: g_i \in \{\mu_{j+1}, \mu_{j+2}, \dots, \mu_{k'}\}} \Pr(D_i | G_i^{suf} = g_i) \end{aligned}$$

**Proof** Corollary 6 states that the optimal genotype configuration given  $C^{pref}$  is  $g_{C^{pref}}^{pref}$ . Lemma 8 proves the multinomial bound  $\frac{n!}{C_0! C_1! \dots C_j!} (1 - p_0 - p_1 - \dots - p_j)^{n - n^{pref}} \geq \Pr((C^{pref}, C^{suf}) | T_\theta)$ . Lastly, the greatest suffix likelihood given  $C^{pref}$  is the maximum likelihood over all suffixes that can result in  $C^{pref}$ . Since  $C = (C^{pref}, C^{suf}) = c(g^{pref}) + c(g^{suf})$  and  $C^{pref} = c(g^{pref})$ , then  $c(g^{suf})_{j'} = 0 \forall j' \leq j$ ; therefore,  $g^{suf}$  cannot contain any genotypes from  $\mu_0, \mu_1, \dots, \mu_{k'}$ , and so the maximum likelihood is the maximum likelihood over the remaining genotypes. ■

### 3 Approximate Posterior Computation

**Theorem 10** Given approximate posteriors defined as follows:

$$\Pr(G = g_\theta^* | D) = \frac{\Pr(D, G = g_\theta^* | \theta) \Pr(\theta)}{\sum_{\theta'} \Pr(D, G = g_{\theta'}^* | \theta') \Pr(\theta')}$$

and the following criteria for bounding:

$$\max_g \Pr(D, G = g, C^{pref} | \theta) < \delta \Pr(D, G = g' | \theta')$$

Then denote  $B$  as the set of  $\theta$  for which all configurations are eventually bound (and thus do not contribute to the posterior approximation):

$$B = \{\theta : \Pr(D, G = g_{C_\theta^*}^*, C_\theta^*, \theta) < \delta \Pr(D, G = g' | \theta')\}$$

then the maximum absolute posterior error is  $< \delta(|\{\forall \theta\}| - 1)$ .

**Proof** Denote  $s_\theta = \Pr(D, G = g_\theta^* | \theta) \Pr(\theta)$  then the posterior for  $\theta$  can be defined as  $\frac{s_\theta}{\sum_{\theta''} s_{\theta''}}$ . Denote the denominator in this computation  $d$  and the denominator in the approximated computation  $d^{(H)} = d - \sum_{\theta' \in H} s_{\theta'}$ .

Because  $\theta'$ , by definition, cannot be in  $B$ :

$$\begin{aligned} \frac{d}{d^{(B)}} & < \frac{d^{(B)} + s_{\theta'} \delta |B|}{d^{(B)}} \\ & = 1 + \frac{s_{\theta'} \delta |B|}{d^{(B)}} \\ & < 1 + \frac{s_{\theta'} \delta |B|}{s_{\theta'}} \\ & = 1 + \delta |B| \end{aligned}$$

$$\begin{aligned}\epsilon_\theta &= \left| \frac{s_\theta}{d} - \frac{s_\theta}{d^{(B)}} \right| \\ \forall \theta \epsilon_\theta &< \left| 1 - \frac{d}{d^{(B)}} \right|\end{aligned}$$

because  $\forall \theta \frac{s_\theta}{d} \geq 0$ .  
 Since  $\frac{d}{d^{(B)}} > 1$ ,

$$\begin{aligned}\left| 1 - \frac{d}{d^{(B)}} \right| &= \frac{d}{d^{(B)}} - 1 \\ &< 1 + \delta|B| - 1 \\ &= \delta|B| \\ &\leq \delta(|\{\forall \theta\}| - 1)\end{aligned}$$

Because  $B$  cannot, by definition, include  $\theta^*$ . ■

## 4 MAP Validity with Replicate Data

**Lemma 11** *Given  $r$  replicate data points for each individual, the genotype distribution  $C$ , and  $\sigma$ , the MAP configuration found by using the mean value of these data points for each individual results in the true MAP configuration.*

**Proof** Denote the replicate data for individual 1 as  $D^{(1)} = (D_1^{(1)}, D_2^{(1)}, \dots, D_r^{(1)})$ . The log likelihood of the genotype configuration  $g$  is:

$$\begin{aligned}f(\sigma) + \sum_i \sum_k^r \frac{\|D_k^{(i)} - g_i\|_2^2}{\sigma^2} \\ = f(\sigma) + \frac{1}{\sigma^2} \sum_i \left[ \sum_k^r D_k^{(i)} \right]^2 + r g_i^2 - 2 \sum_k^r D_k^{(i)} g_i\end{aligned}$$

Because  $\sum_k^r D_k^{(i)2}$  is a constant that does not depend on  $\theta$  or  $g$ , any  $g$  that maximizes the above equation will maximize the following:

$$\frac{1}{\sigma^2} \sum_i r g_i^2 - 2 \sum_k^r D_k^{(i)} g_i = \frac{1}{\sigma^2} \sum_i g_i^2 - 2 g_i \text{mean}(D^{(i)})$$

The equation to maximize without replicate data is:

$$\frac{r}{\sigma^2} \sum_i D_i^2 + g_i^2 - 2 g_i D_i$$

For fixed  $r$  both functions are different by a constant and thus by using the means of the replicate data, the optimal genotype configuration for  $C$  can be reached using Theorem 5. ■
